# Supplementary material
Source: publisher figshare collection journal article supplement (https://frontiersin.figshare.com/ndownloader/files/34105781)
Supplement: Supplementary file 1 [file 34105781]

**Appendix B**

**Table B-1.**Support information from the surveyed area

(a)Correspondence between the indices and village name

| Index | 1 | 2 | 3 | 4 | 5 | 6 | 7 | 8 | 9 |
| --- | --- | --- | --- | --- | --- | --- | --- | --- | --- |
| Villages in Datuo | Dunbei | Qiyuan | Meidong | Meier | Heling | Fengchi | Huangsha | Qinghe | Lingxia |
| Index | 10 | 11 | 12 | 13 | 14 | 15 | 16 | 17 | 18 |
| Villages in Datuo | Chaozhu | Fengguang | Qiaozhuang | Laoyu | Chaonan | Xihe | Tianxing | Mianer | Shankeng |
| Index | 19 | 20 | 21 | 22 | 23 | 24 | 25 |  |  |
| Villages in Datuo | Chengbei | Chengxi | Batou | Dongxing | Dongpian | Zhangyan | Xianguan |  |  |
| Index | 1 | 2 | 3 | 4 | 5 | 6 | 7 | 8 | 9 |
| Villages inRenju | Jinxia | Liuji | Malou | Muxi | Zoufang | Shenan | Huangshe | Shangyuan | Feilong |
| Index | 10 | 11 | 12 | 13 | 14 | 15 |  |  |  |
| Villages inRenju | Caitou | Wufu | Shexi | Fengyi | Gudeing | Renju |  |  |  |
| Index | 1 | 2 | 3 | 4 | 5 | 6 | 7 | 8 | 9 |
| Villages in Dongshi | CO | Lingshui | Yangbei | Zhongcun | Xishui | Dawu | Matang | Maoping | Dongwen |
| Index | 10 | 11 | 12 | 13 | 14 | 15 | 16 | 17 | 18 |
| Villages in Dongshi | Shuangshi | Dongshi | Bailing | Huangdi | Mingyang | Liangting | Wenshui | Jiaoliu | Taiyang |
| Index | 1 | 2 | 3 | 4 | 5 | 6 | 7 | 8 | 9 |
| Villages in Shizheng | Dongtai | Nantai | Shizheng | Xihu | Pinghu | Zhongdong | Tantou | Mianyang | Mashan |
| Index | 10 | 11 | 12 | 13 | 14 | 15 | 16 | 17 | 18 |
| Villages in Shizheng | Xiafeng | Shangfeng | Xianfeng | Zhenghe | Zhouzheng | Zhoushe | Anren | Annan | CO |
| Index | 1 | 2 | 3 | 4 | 5 | 6 | 7 | 8 | 9 |
| Villages in Bachi | Zhangtian | Feitian | Bachi | Jiaokeng | Huangsha | Paixia | Shengzhu | Louqian | Nantang |
| Index | 10 | 11 | 12 |  |  |  |  |  |  |
| Villages in Bachi | Shifeng | Fengtou | CO |  |  |  |  |  |  |
| Index | 1 | 2 | 3 | 4 | 5 | 6 | 7 |  |  |
| Villages in Chagan | Xinling | Huyang | Sanda | Chagan | Wenfeng | Jiafeng | Ruixi |  |  |
| Index | 1 | 2 | 3 | 4 | 5 | 6 |  |  |  |
| Villages in Shangju | Shenao | Shangju | Longwen | Fekeng | Wenyu | Bashe |  |  |  |
| Index | 1 | 2 | 3 | 4 | 5 | 6 | 7 | 8 |  |
| Villages in Sishui | Sishui | Jintian | Wengui | Dashe | Mulian | Daxin | Meishe | Chengwen |  |
| Index | 1 | 2 | 3 | 4 | 5 | 6 | 7 | 8 |  |
| Villages in Changtian | Hecai | Changjiang | Changqing | Gaonan | Changan | Guanren | Changtian |  |  |
| Index | 1 | 2 | 3 | 4 | 5 | 6 | 7 | 8 | 9 |
| Villages in Retuo | CO | Caishang | Reshui | Retuo | Shengping | Xiaotuo | Shangshan | Hankeng | Xiahuang |
| Index | 1 | 2 | 3 | 4 | 5 | 6 |  |  |  |
| Villages in Zhonghang | Zhonghang | Rudi | Kuaihu | Guankeng | Shishe | Zhongshi |  |  |  |
| Index | 1 | 2 | 3 | 4 | 5 | 6 | 7 | 8 | 9 |
| Villages in Hetou | Hetou | Xiangya | Heqing | Zhangkeng | Huangtian | Zhukeng | Tianxin | Xiangyang | Shuangxi |

PS: CO in the table represents the Committee Office, from where the garbage is independently collected and transported to the transfer station in the town.

**(b)**Location

| ***Datuo*** | *Longitude* | *Latitude* | ***Renju*** | *Longitude* | *Latitude* | ***Dongshi*** | *Longitude* | *Latitude* |
| --- | --- | --- | --- | --- | --- | --- | --- | --- |
| Dunbei | 115.8994 | 24.5850 | Jinxia | 115.9086 | 24.8155 | CO | 115.9601 | 24.6786 |
| Qiyuan | 115.9025 | 24.5739 | Liuji | 115.8961 | 24.8538 | Lingshui | 115.9797 | 24.7161 |
| Meidong | 115.9086 | 24.5753 | Malou | 115.9177 | 24.7749 | Yangbei | 115.9582 | 24.7322 |
| Meier | 115.9483 | 24.5556 | Muxi | 115.8534 | 24.8680 | Zhongcun | 116.0195 | 24.6231 |
| Heling | 115.9118 | 24.5976 | Zoufang | 115.8668 | 24.8392 | Xishui | 115.9719 | 24.7107 |
| Fengchi | 115.8784 | 24.5611 | Shenan | 115.8794 | 24.8342 | Dawu | 115.9478 | 24.6625 |
| Huangsha | 115.925 | 24.5907 | Huangshe | 115.8436 | 24.8113 | Matang | 115.9805 | 24.7002 |
| Qinghe | 115.9005 | 24.5812 | Shangyuan | 115.8661 | 24.7787 | Maoping | 115.9935 | 24.6482 |
| Lingxia | 115.8925 | 24.5735 | Feilong | 115.8885 | 24.8074 | Dongwen | 115.9850 | 24.6842 |
| Chaozhu | 115.9092 | 24.5388 | Caitou | 115.8402 | 24.8618 | Shuangshi | 115.9506 | 24.6720 |
| Fengguang | 115.905 | 24.5556 | Wufu | 115.9160 | 24.8327 | Dongshi | 115.9598 | 24.6812 |
| Qiaozhuang | 115.9136 | 24.5514 | Shexi | 115.9496 | 24.8280 | Bailing | 115.9987 | 24.7225 |
| Laoyu | 115.9095 | 24.5465 | Fengyi | 115.8278 | 24.8188 | Huangdi | 116.0250 | 24.6054 |
| Chaonan | 115.9188 | 24.5207 | Gudeing | 115.8116 | 24.8379 | Mingyang | 115.9500 | 24.6493 |
| Xihe | 115.8995 | 24.5468 | Renju | 115.8998 | 24.8186 | Liangting | 115.9848 | 24.6863 |
| Tianxing | 115.8762 | 24.5336 |  |  |  | Wenshui | 115.9704 | 24.6814 |
| Mianer | 115.9066 | 24.5065 |  |  |  | Jiaoliu | 115.9847 | 24.6080 |
| Shankeng | 115.8995 | 24.4888 |  |  |  | Taiyang | 116.0034 | 24.6681 |
| Chengbei | 115.9423 | 24.6259 |  |  |  |  |  |  |
| Chengxi | 115.9288 | 24.6119 |  |  |  |  |  |  |
| Batou | 115.9447 | 24.6105 |  |  |  |  |  |  |
| Dongxing | 115.954 | 24.6318 |  |  |  |  |  |  |
| Dongpian | 115.9487 | 24.6244 |  |  |  |  |  |  |
| Zhangyan | 115.9545 | 24.5897 |  |  |  |  |  |  |
| Xianguan | 115.955 | 24.5697 |  |  |  |  |  |  |
| ***Shizheng*** | *Longitude* | *Latitude* | ***Bachi*** | *Longitude* | *Latitude* | ***Chagan*** | *Longitude* | *Latitude* |
| Dongtai | 115.8415 | 24.5270 | Zhangtian | 115.8325 | 24.7280 | Xinling | 115.9173 | 24.9203 |
| Nantai | 115.8389 | 24.5293 | Feitian | 115.8041 | 24.7672 | Huyang | 115.9125 | 24.9018 |
| Shizheng | 115.8340 | 24.5173 | Bachi | 115.8160 | 24.7426 | Sanda | 115.9308 | 24.8997 |
| Xihu | 115.8374 | 24.5147 | Jiaokeng | 115.7924 | 24.7522 | Chagan | 115.9593 | 24.8884 |
| Pinghu | 115.8534 | 24.5134 | Huangsha | 115.8529 | 24.7575 | Wenfeng | 115.9617 | 24.8670 |
| Zhongdong | 115.8521 | 24.5063 | Paixia | 115.7850 | 24.7680 | Jiafeng | 115.9687 | 24.8887 |
| Tantou | 115.8600 | 24.4971 | Shengzhu | 115.8331 | 24.7982 | Ruixi | 116.0339 | 24.8834 |
| Mianyang | 115.8812 | 24.5069 | Louqian | 115.8369 | 24.7570 |  |  |  |
| Mashan | 115.8511 | 24.4849 | Nantang | 115.8172 | 24.7778 |  |  |  |
| Xiafeng | 115.8408 | 24.4910 | Shifeng | 116.1708 | 24.8417 |  |  |  |
| Shangfeng | 115.8167 | 24.4858 | Fengtou | 115.8037 | 24.8094 |  |  |  |
| Xianfeng | 115.8332 | 24.5095 | CO | 115.8168 | 24.7437 |  |  |  |
| Zhenghe | 115.8275 | 24.5167 |  |  |  |  |  |  |
| Zhouzheng | 115.8208 | 24.5132 |  |  |  |  |  |  |
| Zhoushe | 115.8113 | 24.5144 |  |  |  |  |  |  |
| Anren | 115.8220 | 24.5373 |  |  |  |  |  |  |
| Annan | 115.8180 | 24.5344 |  |  |  |  |  |  |
| CO | 115.8361 | 24.5203 |  |  |  |  |  |  |
| ***Shangju*** | *Longitude* | *Latitude* | ***Sishui*** | *Longitude* | *Latitude* | ***Changtian*** | *Longitude* | *Latitude* |
| Shenao | 115.9555 | 24.7739 | Sishui | 116.0352 | 24.7560 | Hecai | 115.9504 | 24.4627 |
| Shangju | 115.9975 | 24.7929 | Jintian | 116.0499 | 24.8248 | Changjiang | 115.9669 | 24.4905 |
| Longwen | 115.9843 | 24.8158 | Wengui | 116.0614 | 24.7963 | Changqing | 115.9973 | 24.4513 |
| Fekeng | 116.0325 | 24.7996 | Dashe | 116.0598 | 24.7404 | Gaonan | 115.9930 | 24.4849 |
| Wenyu | 115.9926 | 24.8344 | Mulian | 116.0775 | 24.7594 | Changan | 115.9687 | 24.4808 |
| Bashe | 116.0382 | 24.8477 | Daxin | 116.1086 | 24.7454 | Guanren | 115.9558 | 24.4811 |
|  |  |  | Meishe | 116.0470 | 24.7249 | Changtian | 115.9707 | 24.4747 |
|  |  |  | Chengwen | 116.0720 | 24.7133 |  |  |  |
| ***Retuo*** | *Longitude* | *Latitude* | ***Zhonghang*** | *Longitude* | *Latitude* | ***Hetou*** | *Longitude* | *Latitude* |
| CO | 115.9926 | 24.5387 | Zhonghang | 115.8319 | 24.6668 | Hetou | 115.8840 | 24.6822 |
| Caishang | 116.0256 | 24.5173 | Rudi | 115.8094 | 24.6585 | Xiangya | 115.9036 | 24.7354 |
| Reshui | 116.0015 | 24.5063 | Kuaihu | 115.8528 | 24.6948 | Heqing | 115.8955 | 24.6342 |
| Retuo | 115.9912 | 24.5396 | Guankeng | 115.8372 | 24.6885 | Zhangkeng | 115.9042 | 24.6980 |
| Shengping | 115.9730 | 24.5672 | Shishe | 115.8493 | 24.6301 | Huangtian | 115.8905 | 24.6984 |
| Xiaotuo | 115.9869 | 24.5872 | Zhongshi | 115.8289 | 24.6297 | Zhukeng | 115.8936 | 24.6783 |
| Shangshan | 116.0020 | 24.5697 |  |  |  | Tianxin | 115.8790 | 24.6713 |
| Hankeng | 116.0343 | 24.5749 |  |  |  | Xiangyang | 115.8810 | 24.6572 |
| Xiahuang | 116.0242 | 24.6058 |  |  |  | Shuangxi | 115.8784 | 24.6430 |

PS: The first term of the column that is on the left of the longitude column denotes the town name.

**(c)**Population and garbage production

| ***Datuo*** | *Population* | *Garbage(ton)* | ***Renju*** | *Population* | *Garbage(ton)* | ***Dongshi*** | *Population* | *Garbage(ton)* |
| --- | --- | --- | --- | --- | --- | --- | --- | --- |
| Dunbei | 3940 | 736.78 | Jinxia | 792 | 148.10 | CO | **1458** | 272.65 |
| Qiyuan | 2688 | 502.66 | Liuji | 326 | 60.96 | Lingshui | **721** | 134.83 |
| Meidong | 2685 | 502.10 | Malou | 478 | 89.39 | Yangbei | **2113** | 395.13 |
| Meier | 931 | 174.10 | Muxi | 856 | 160.07 | Zhongcun | **798** | 149.23 |
| Heling | 1072 | 200.46 | Zoufang | 950 | 177.65 | Xishui | **1700** | 317.90 |
| Fengchi | 914 | 170.92 | Shenan | 780 | 145.86 | Dawu | **1670** | 312.29 |
| Huangsha | 1031 | 192.80 | Huangshe | 1600 | 299.20 | Matang | **1528** | 285.74 |
| Qinghe | 1920 | 359.04 | Shangyuan | 414 | 77.42 | Maoping | **1420** | 265.54 |
| Lingxia | 3410 | 637.67 | Feilong | 1309 | 244.78 | Dongwen | **2500** | 467.50 |
| Chaozhu | 2024 | 378.49 | Caitou | 526 | 98.36 | Shuangshi | **1634** | 305.56 |
| Fengguang | 821 | 153.53 | Wufu | 820 | 153.34 | Dongshi | **2668** | 498.92 |
| Qiaozhuang | 634 | 118.56 | Shexi | 300 | 56.10 | Bailing | **240** | 44.88 |
| Laoyu | 889 | 166.24 | Fengyi | 416 | 77.79 | Huangdi | **250** | 46.75 |
| Chaonan | 1806 | 337.72 | Gudeing | 492 | 92.00 | Mingyang | **2478** | 463.39 |
| Xihe | 1590 | 297.33 | Renju | 2212 | 413.64 | Liangting | **3338** | 624.21 |
| Tianxing | 1476 | 276.01 |  |  |  | Wenshui | **1630** | 304.81 |
| Mianer | 839 | 156.89 |  |  |  | Jiaoliu | **577** | 107.90 |
| Shankeng | 442 | 82.65 |  |  |  | Taiyang | **1325** | 247.78 |
| Chengbei | 1949 | 364.46 |  |  |  |  |  |  |
| Chengxi | 1409 | 263.48 |  |  |  |  |  |  |
| Batou | 2783 | 520.42 |  |  |  |  |  |  |
| Dongxing | 1354 | 253.20 |  |  |  |  |  |  |
| Dongpian | 2075 | 388.03 |  |  |  |  |  |  |
| Zhangyan | 1864 | 348.57 |  |  |  |  |  |  |
| Xianguan | 648 | 121.18 |  |  |  |  |  |  |
| ***Shizheng*** | *Population* | *Garbage(ton)* | ***Bachi*** | *Population* | *Garbage(ton)* | ***Chagan*** | *Population* | *Garbage(ton)* |
| Dongtai | 938 | 175.41 | Zhangtian | 306 | 57.22 | Xinling | 499 | 93.31 |
| Nantai | 2258 | 422.25 | Feitian | 526 | 98.36 | Huyang | 628 | 117.44 |
| Shizheng | 2364 | 442.07 | Bachi | 1450 | 271.15 | Sanda | 596 | 111.45 |
| Xihu | 1848 | 345.58 | Jiaokeng | 931 | 174.10 | Chagan | 1945 | 363.72 |
| Pinghu | 1530 | 286.11 | Huangsha | 256 | 47.87 | Wenfeng | 803 | 150.16 |
| Zhongdong | 1593 | 297.89 | Paixia | 276 | 51.61 | Jiafeng | 818 | 152.97 |
| Tantou | 896 | 167.55 | Shengzhu | 820 | 153.34 | Ruixi | 1055 | 197.29 |
| Mianyang | 717 | 134.08 | Louqian | 620 | 115.94 |  |  |  |
| Mashan | 1361 | 254.51 | Nantang | 520 | 97.24 |  |  |  |
| Xiafeng | 998 | 186.63 | Shifeng | 426 | 79.66 |  |  |  |
| Shangfeng | 525 | 98.18 | Fengtou | 950 | 177.65 |  |  |  |
| Xianfeng | 2493 | 466.19 | CO | 2000 | 374.00 |  |  |  |
| Zhenghe | 868 | 162.32 |  |  |  |  |  |  |
| Zhouzheng | 1708 | 319.40 |  |  |  |  |  |  |
| Zhoushe | 1076 | 201.21 |  |  |  |  |  |  |
| Anren | 1558 | 291.35 |  |  |  |  |  |  |
| Annan | 1649 | 308.36 |  |  |  |  |  |  |
| CO |  |  |  |  |  |  |  |  |
| ***Shangju*** | *Population* | *Garbage(ton)* | ***Sishui*** | *Population* | *Garbage(ton)* | ***Changtian*** | *Population* | *Garbage(ton)* |
| Shenao | 825 | 154.28 | Sishui | 1430 | 267.41 | Hecai | 490 | 91.63 |
| Shangju | 651 | 121.74 | Jintian | 731 | 136.70 | Changjiang | 700 | 130.90 |
| Longwen | 382 | 71.43 | Wengui | 612 | 114.44 | Changqing | 832 | 155.58 |
| Fekeng | 253 | 47.31 | Dashe | 310 | 57.97 | Gaonan | 710 | 132.77 |
| Wenyu | 836 | 156.33 | Mulian | 480 | 89.76 | Changan | 980 | 183.26 |
| Bashe | 539 | 100.79 | Daxin | 658 | 123.05 | Guanren | 920 | 172.04 |
|  |  |  | Meishe | 600 | 112.20 | Changtian | 1800 | 336.60 |
|  |  |  | Chengwen | 350 | 65.45 |  |  |  |
| ***Retuo*** | *Population* | *Garbage(ton)* | ***Zhonghang*** | *Population* | *Garbage(ton)* | ***Hetou*** | *Population* | *Garbage(ton)* |
| CO | 500 | 93.50 | Zhonghang | 1150 | 215.05 | Hetou | 1060 | 198.22 |
| Caishang | 430 | 80.41 | Rudi | 750 | 140.25 | Xiangya | 712 | 133.14 |
| Reshui | 1700 | 317.90 | Kuaihu | 970 | 181.39 | Heqing | 868 | 162.32 |
| Retuo | 2200 | 411.40 | Guankeng | 510 | 95.37 | Zhangkeng | 660 | 123.42 |
| Shengping | 830 | 155.21 | Shishe | 780 | 145.86 | Huangtian | 572 | 106.96 |
| Xiaotuo | 880 | 164.56 | Zhongshi | 895 | 167.37 | Zhukeng | 292 | 54.60 |
| Shangshan | 960 | 179.52 |  |  |  | Tianxin | 980 | 183.26 |
| Hankeng | 1020 | 190.74 |  |  |  | Xiangyang | 1484 | 277.51 |
| Xiahuang | 680 | 127.16 |  |  |  | Shuangxi | 1068 | 199.72 |
